# Supplementary material for: CircTCF4 Suppresses Proliferation and Differentiation of Goat Skeletal Muscle Satellite Cells Independent from AGO2 Binding
Source: MDPI journal article supplement (doi:10.3390/ijms232112868), 2022-10-25

# Supplementary information

**Supplementary Table S1.** Information of primers used in this study.

| Primer             | Sequence of Primer (5'-3')                          | T <sub>m</sub> (°C) | Length (bp) |
|--------------------|-----------------------------------------------------|---------------------|-------------|
| <i>circTCF4 qc</i> | F: CAAATAGAGGAAGCGGGGCA<br>R: CATGAGTGAGTGTCTGTTGG  | 60°C                | 428 bp      |
| <i>circTCF4 dp</i> | F: ATGGAACCGGTCTTCTCTCC<br>R: CTGGAAGACCTTGACACTG   | 53.9°C              | 118 bp      |
| <i>GAPDH</i>       | F: GCAAGTTCCACGGCACAG<br>R: GGTTCACGCCCATCACAA      | 59°C                | 249bp       |
| <i>MyoD</i>        | F: GTGCAAACGCAAGACGACTA<br>R: GCTGGTTTGGGTTGCTAGAC  | 60.7°C              | 128 bp      |
| <i>MyoG</i>        | F: GGACCCTACAGATGCCCCACA<br>R: TTGGTATGGTTTCATCTGGG | 60.7°C              | 101 bp      |
| <i>MyHC</i>        | F: CCACATCTTCTCCATCTCTG<br>R: GGTTCCTCCTTCTTCTTCTC  | 61.3 °C             | 171 bp      |
| <i>Myomaker</i>    | F: CCCTGGCTCTCATGTTGCGCT<br>R: TGCATTCCGGCCTTCTTGTT | 56.9°C              | 131 bp      |
| <i>Myomerger</i>   | F: GGGCTGTCTGTTGTTCTGTC<br>R: AGCATTTACAGGGGGCACAGC | 58.3 °C             | 146 bp      |
| <i>Pax7</i>        | F: AGGACGAAGCGGACAAGAA<br>R: TCCAGACGGTTCCTTTGT     | 59.7°C              | 92 bp       |
| <i>PCNA</i>        | F: GGAGAACTTGGAAATGGAAA<br>R: TGTAGGAGACAGTGGAGTGG  | 61.3°C              | 156 bp      |
| <i>CAVIN1</i>      | F: AAGAAGCTGGAGGTCAACGA<br>R: GGCAGTTTCACTTCATCCTGA | 57.7°C              | 138 bp      |
| <i>SSRP1</i>       | F: CCGAGGGCTGAAAGAGAAAA<br>R: GAGTCATCGCTGCTGTCGTT  | 60.7°C              | 121 bp      |
| <i>GANAB</i>       | F: TAGTCTCACGCTCGGTAGCA<br>R: GGTCTCATCTGGCTTGTCGT  | 60.4 °C             | 131 bp      |
| <i>COL4A1</i>      | F: TTCGACATACGGCTCAAGGG<br>R: AATCCTACTGAACCCGGGGA  | 58.9°C              | 111 bp      |
| <i>CNN1</i>        | F: AGCATGTCCTCCGCTCACTT<br>R: ATACTTCTGGGCCAGCTTGTT | 59.3 °C             | 126 bp      |
| <i>MAP1A</i>       | F: CTGCGTGAGGCCGGAG<br>R: TCCAGGAGAGAATGCCTTGT      | 59.7°C              | 91 bp       |
| <i>AEBP1</i>       | F: ACTCCAGCATCCATGACGAC<br>R: GGTCAATTCCTCGTAGCCGT  | 60.3°C              | 155 bp      |
| <i>MYH9</i>        | F: CCATTTTGTGCACGGGTGAG<br>R: CACGTGAGCCAGGTACTGAA  | 60.7°C              | 118 bp      |

|              |                                                    |        |        |
|--------------|----------------------------------------------------|--------|--------|
| <i>CCND1</i> | F: TCTCCTATCACCGCCTGACA<br>R: TTGGGGTCCAAGTTCTGCTG | 60.7°C | 139 bp |
| <i>CDK2</i>  | F: CCGTCCACATAGGTTTCCCA<br>R: GTTGGCCTTACACAGTGGCT | 60.3°C | 109 bp |
| <i>P53</i>   | F: CAGCGTTCGGTTTCGTGTTT<br>R: CCAGTGTACTCCTTGGGCAG | 60.3°C | 94 bp  |

Abbreviation: circTCF4 qc: Full-length amplified primers for circTCF4; circTCF4 dp: Identification and quantitative primers of circTCF4.

**Supplementary Table S2. Summary and quality assessment of RNA-sequencing data.**

| sample   | raw_reads | clean_reads | clean_bases | Q20   | Q30   | GC_pct |
|----------|-----------|-------------|-------------|-------|-------|--------|
| si_NC_1  | 39578608  | 37874262    | 5.68G       | 98.26 | 94.97 | 48.29  |
| si_NC_2  | 45261592  | 42653314    | 6.4G        | 98.15 | 94.56 | 48.57  |
| si_NC_3  | 42072296  | 40025974    | 6.0G        | 98.34 | 95.07 | 48.02  |
| si_TCF_1 | 46977900  | 46415598    | 6.96G       | 97.5  | 93.24 | 51.22  |
| si_TCF_2 | 44598750  | 43387504    | 6.51G       | 98.14 | 94.73 | 50.65  |
| si_TCF_3 | 45767536  | 43867278    | 6.58G       | 98.37 | 95.25 | 50.28  |

Abbreviation : TCF: circTCF4.

**Supplementary Table S3. The genomic mapping results of clean reads.**

| sample   | total_reads | total_map        | unique_map       | multi_map      |
|----------|-------------|------------------|------------------|----------------|
| si_NC_1  | 37874262    | 36907971(97.45%) | 34800858(91.89%) | 2107113(5.56%) |
| si_NC_2  | 42653314    | 41586936(97.5%)  | 39245406(92.01%) | 2341530(5.49%) |
| si_NC_3  | 40025974    | 39105882(97.7%)  | 36604007(91.45%) | 2501875(6.25%) |
| si_TCF_1 | 46415598    | 44850370(96.63%) | 42071630(90.64%) | 2778740(5.99%) |
| si_TCF_2 | 43387504    | 42246219(97.37%) | 40000320(92.19%) | 2245899(5.18%) |
| si_TCF_3 | 43867278    | 42799080(97.56%) | 40372883(92.03%) | 2426197(5.53%) |

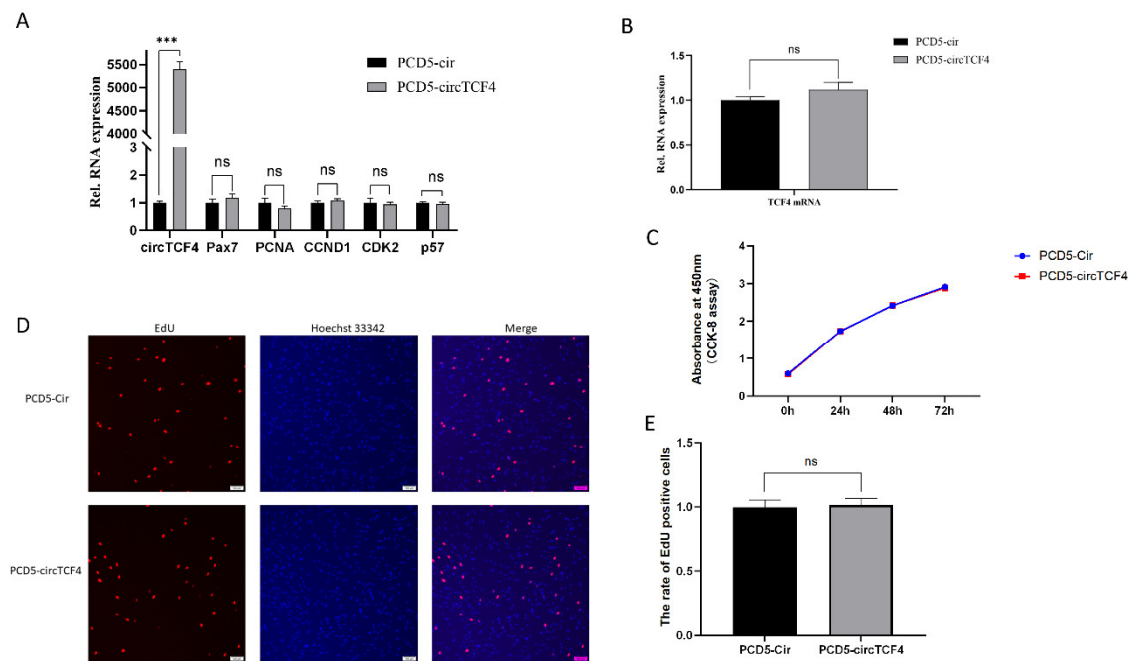

**Supplementary Figure S1.** Effect of overexpressing circTCF4 (PCD5-circTCF4) on the expression of proliferation genes of goat MUSCs. A, Expression of circTCF4 and proliferation marker genes of goat MUSCs. B, Changes in *TCF4* mRNA levels. C, The absorbance of cells at 450 nm. D, The EdU stained nuclei in cells. E, Statistical results of EdU positive cells. Data are means  $\pm$  standard error with at least three biological replicates, \*\*\*  $p < 0.001$ , ns means insignificant difference.

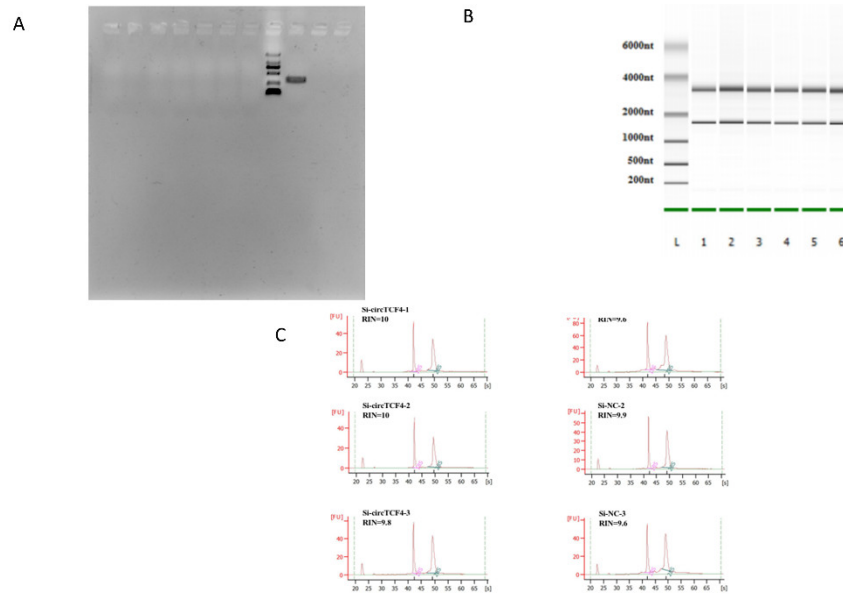

**Supplementary Figure S2.** Detection of mycoplasma and sequencing samples RNA quality. A, Results of Mycoplasma Detection. B, Gel electrophoresis of total RNA. C, Electropherogram of total RNA using Agilent 2100 Bioanalyzer.

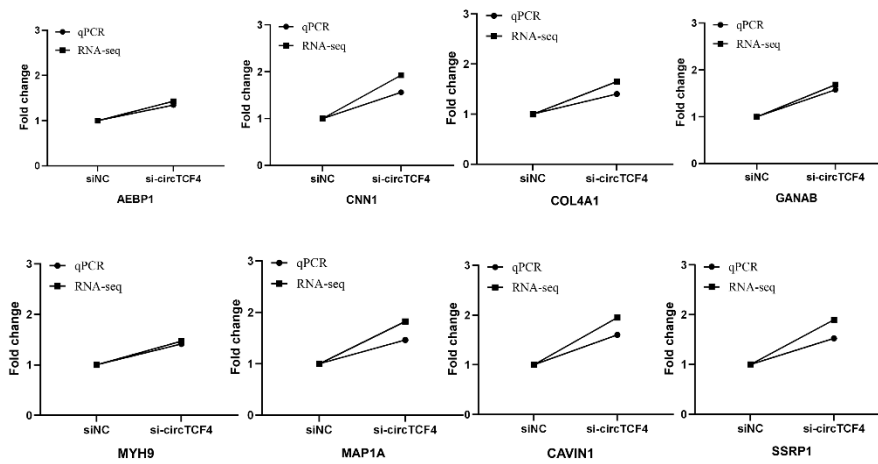

**Supplementary Figure S3.** The mRNA expression level verified by RT-qPCR.

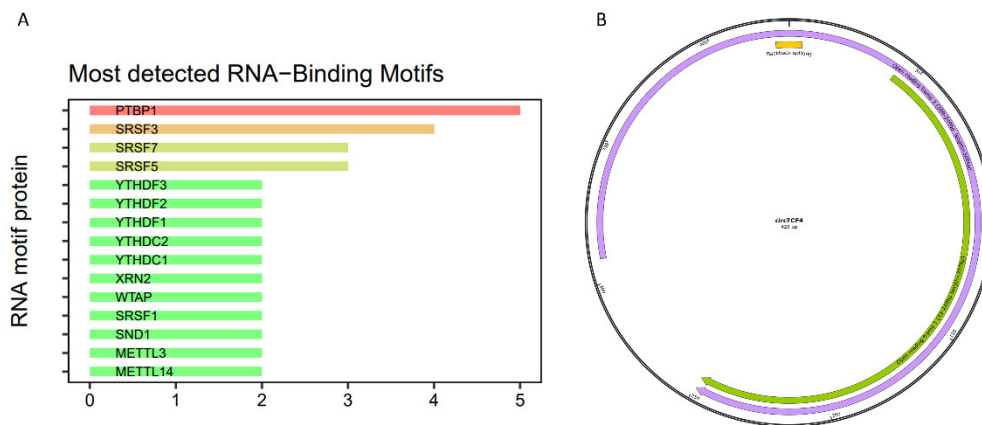

Supplement: s1 [file s1]
